# Supplementary material
Source: publisher site journal article supplement (https://www.dovepress.com/article/432976)
Supplement: Supplementary file 1 [file get_supplementary_file.php]

Supplementary Table 1: Associations between sociodemographic and HIV-related characteristics and viral suppression among newly diagnosed patients on multi-month dispensing of ART

|  | Sample on MMD with month 6 VL, N=2,962 | aRR (95%CI) | Sample on MMD with month 12 VL, N=2,352 | aRR (95%CI) |
| --- | --- | --- | --- | --- |
| Age (years) |  |  |  |  |
| 10-19 | 193 (7%) | Reference | 143 (6%) | Reference |
| 20-24 | 361 (12%) | 1.07 (0.89-1.30) | 249 (11%) | 1.08 (0.87-1.36) |
| >24 | 2408 (81%) | 1.09 (0.92-1.28) | 1960 (83%) | 1.10 (0.91-1.33) |
| Gender |  |  |  |  |
| Male | 1026 (34%) | Reference | 819 (35%) | Reference |
| Female | 1936 (65%) | 1.02 (0.94-1.10) | 1533 (65%) | 1.01 (0.92-1.11) |
| ART Regimen |  |  |  |  |
| DTG | 2686 (91%) | Reference | 2043 (87%) | Reference |
| NNRTI | 256 (9%) | 0.98 (0.85-1.12) | 285 (12%) | 0.95 (0.83-1.09) |
| PI | 12 (<1%) | 0.47 (0.20-1.13) | 9 (<1%) | 0.99 (0.50-1.99) |
| Other | 6 (<1%) | 1.13 (0.51-2.52) | 12 (<1%) | 0.75 (0.37-1.49) |
|  |  |  |  |  |
| Enrollment period |  |  |  |  |
| Pre-COVID-19 | 1707 (58%) | Reference | 1870 (80%) | Reference |
| During COVID-19 | 1255 (42%) | 1.00 (0.92-1.08) | 482 (20%) | 1.03 (0.93-1.14) |

VL: Viral load

ART: Antiretroviral therapy

DTG: Dolutegravir

NNRTI: Non-nucleoside reverse transcriptase inhibitors

PI: Protease inhibitors

MMD: Multi-month dispensing

aRR (95%CI): Relative risk (95% confidence interval) comparing viral suppression of the groups to the reference at month 6

bRR (95%CI): Relative risk (95% confidence interval) comparing viral suppression of the groups to the reference at month 12
